## Ovo1 links Wnt signaling with N-cadherin localization during neural crest migration

**Sarah Piloto and Thomas F. Schilling**

There was an error published in *Development* **137**, 1981-1990.

On p. 1983, the GEO accession for the microarray data should read GSE21539.

The authors apologise to readers for this error.
